# Supplementary material for: Exploring aortic stiffness in aging mice: a comprehensive methodological overview
Source: publisher site journal article supplement (doi:10.18632/aging.206168), 2024-12-02
Supplement: Supplementary file [file aging-vnull-206168-supplementary-material-SD2.pdf]

**SUPPLEMENTARY FIGURES**

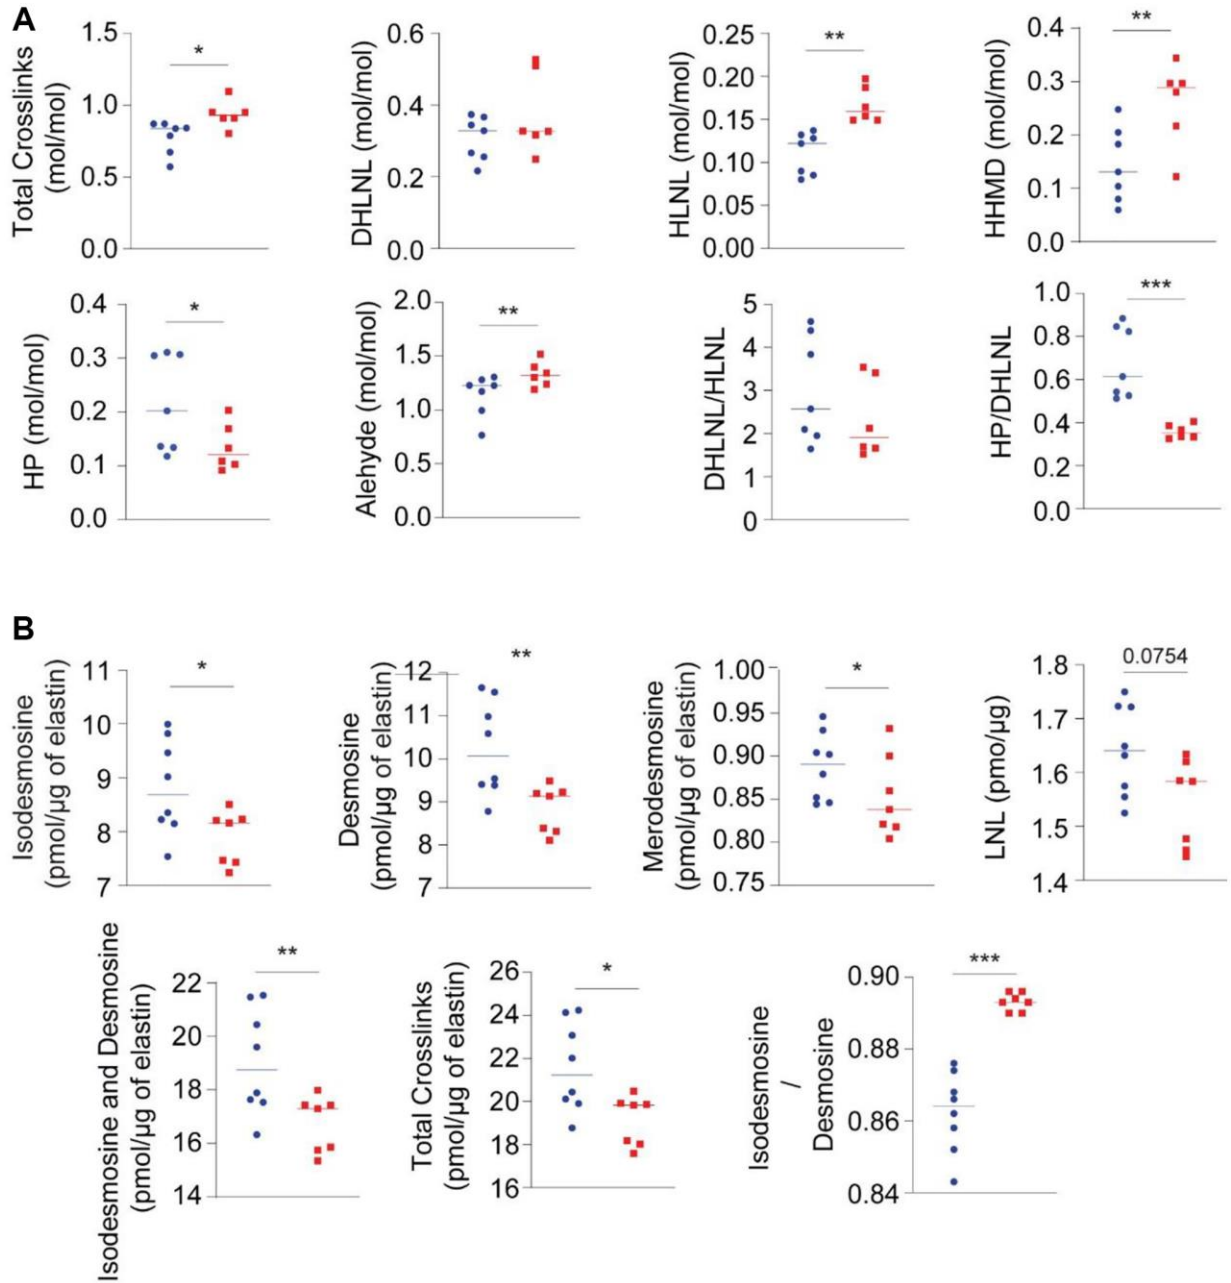

**Supplementary Figure 1. Evaluation of crosslinks in the abdominal aorta of young (blue) or old (red) mice. (A) Collagen cross-links. (B) Elastin cross-links. Statistical test: Mann-Whitney. Mean +/- SEM. Significant differences (\* $p < 0.05$ , \*\* $p < 0.001$ , \*\*\* $p < 0.0001$ , Mann-Whitney).**

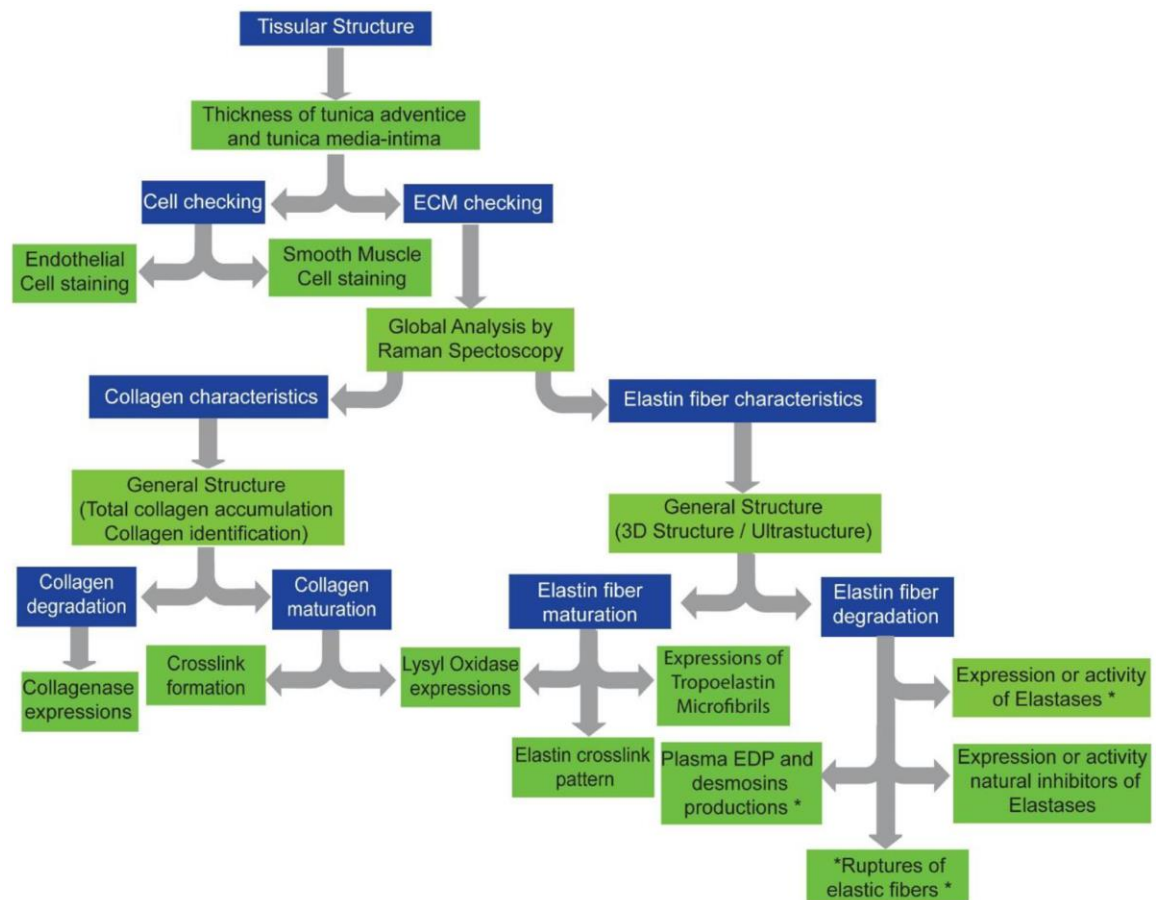

**Supplementary Figure 2. Summary of the decision tree allowing the study of vascular stiffness by morphological approaches.** “\*” identifies parameters that are methodologically accessible for clinical studies.
