# Supplementary material for: Exploring aortic stiffness in aging mice: a comprehensive methodological overview
Source: publisher site journal article supplement (doi:10.18632/aging.206168), 2024-12-02
Supplement: Supplementary file [file aging-vnull-206168-supplementary-material-SD3.pdf]

## SUPPLEMENTARY TABLES

**Supplementary Table 1. Variations of aortic parameters from young to aged in mice and humans.**

|                                                           | Mouse                         | Human                                        |
|-----------------------------------------------------------|-------------------------------|----------------------------------------------|
| <b>Systolic blood pressure (mmHg)</b>                     | = or ↑ [8–11]                 | ↑ [12, 13]                                   |
| <b>Aortic stiffness</b>                                   | ↑ [9, 10, 14]                 | ↑ [12, 13, 15–18]                            |
| <b>Aortic structure</b>                                   |                               |                                              |
| Lumen diameter                                            | ↑ [9, 10, 19, 21]             | ↑ [12, 15, 16, 18]                           |
| Wall thickness                                            | ↑ [9, 10, 20, 21]             | ↑ [14–17]                                    |
| Number of elastic lamellae                                | = [9, 10]                     | = [17]                                       |
| Adventitia thickness                                      | = [22]                        | = [23]                                       |
| <b>Elastic fiber-related processes in the aortic wall</b> |                               |                                              |
| Elastogenesis                                             | ↓ [24]                        | ↓ [25]                                       |
| Elastolysis                                               | ↑ [26]                        | = or ↑ [25, 27, 28]                          |
| <b>Endothelial cell function</b>                          |                               |                                              |
| Basal NO production                                       | ↓ [21, 29, 30]                | ↓ (Dilation of forearm arteries) [31, 32]    |
| Acetylcholine-triggered NO production                     | ↓ [21, 30, 33, 34]            | ↓ (Dilation of forearm arteries) [15, 35–37] |
| Permeability                                              | ↑ [38, 39]                    | ↑ (Corneal endothelial cells) [40]           |
| <b>Vascular smooth muscle cell function</b>               |                               |                                              |
| Elastin production                                        | ↓ [24]                        | ↓ [25, 41]                                   |
| Contractility                                             | ↓, = or ↑ [9, 10, 20, 21, 34] | ↓, = or ↑ [42, 43]                           |
| <b>Susceptibility to atherogenesis</b>                    | ↑ or = [44–48]                | ↑ [13, 49, 50]                               |
| <b>Left ventricular hypertrophy (LVH)</b>                 | ↑ [9]                         | ↑ [13]                                       |

The complete list of references (here in brackets) can be found in the supplementary section.

**Supplementary Table 2. Sequences used for qPCR.**

| Gene name                                               | Forward sequence (5' → 3') | Reverse sequence (5' → 3') |
|---------------------------------------------------------|----------------------------|----------------------------|
| RPS26                                                   | TAGAAGCCGCTGCTGTCAGG       | GGCACAGCTCACGCAATAATG      |
| 36B4                                                    | AAAGCCTGGAAGAAGGAGGTC      | AGATTCCGGATATGCTGTTGG      |
| MMP-1                                                   | CACTCCCTGGGCTCACTCA        | GTTGCACCTGTTGGCTGGAT       |
| MMP-2                                                   | ATCGAGACCATGCGGAAGC        | GCCCGAGCAAAAGCATCAT        |
| MMP-8                                                   | AACGGGAAGACATAC            | GGGTCCATGGATCTT            |
| MMP-9                                                   | CACGGAGACGGGTATCCCTT       | GGGCACCATTTGAGTTTCCAT      |
| MMP13                                                   | CAGTCTCCGAGGAGAACTATGAT    | GGACTTTGTCAAAAAGAGCTCAG    |
| Myosin light-chain kinase ( <i>MLCK</i> )               | TGGGGGACGTGAAACTGTTTG      | GGGGCAGAATGAAAGCTGG        |
| Neutrophil elastase ( <i>NE</i> )                       | TGGAGGTCATTTCTGTGGTG       | CTGCACTGACCGGAAAATTTAG     |
| Cathepsin-S                                             | GCGTCACTGAGGTGAAATACC      | CCCCACAGCACTGAAAG          |
| Cystatin C                                              | ATGACCAGCCCCATCTGA         | CCAGGGCACGCTGTAGAT         |
| Tissue inhibitors of metalloproteinase ( <i>Timp1</i> ) | TCCCCAGAAATCAACGAGACC      | GTACCGGATATCTGCGGCATT      |
| Serine peptidase inhibitor ( <i>SERPIN</i> )            | TAGGGAGCAAGGGTGACACTC      | ACTGTCTGGTCTGTTGAGGGT      |
| Elastin ( <i>ELN</i> )                                  | GCTGCTGCTAAGGCTGCTAA       | AGCACCTGGGAGCCTAACTC       |
| Fibrillin 1 ( <i>FBN1</i> )                             | GGACGGAAAGAAGTGTGAAGAT     | ACACATTCGGTTTAGGCACA       |
| Fibulin 5 ( <i>FBLN5</i> )                              | ATCTGCTGATTGGTGAAAACC      | ATGGTGAATGGCTGGTCTCT       |
| Lysyl oxidase like 1 ( <i>LOXL1</i> )                   | GAATACTGAGCCAGACTGGC       | GGGTCTCATTGAAATTAGTATCC    |
| Lysyl oxidase like 2 ( <i>LOXL2</i> )                   | ATGACCTGCTGAGCCTCAAC       | CAGTGTCTCCAGGCAGAAG        |
| Lysyl oxidase like 3 ( <i>LOXL3</i> )                   | ATGGGTGCCATCCACTTGAG       | TGTTCTTGGACGGGCATCTC       |
| Lysyl oxidase like 4 ( <i>LOXL4</i> )                   | GGTTGTGAACCCACAAACG        | CTGCATTGGCTCGGTAGGAA       |

|                                         |                        |                        |
|-----------------------------------------|------------------------|------------------------|
| Lysyl oxidase (LOX)                     | CTATTCGATCCCACGCTGCT   | CCTCACAATGGGGATGTGCT   |
| Latent TGF beta binding protein (Ltp-4) | CGTCAACGAGTGTGATGAGG   | GAGCAAATCCTGGACGACAG   |
| Smooth muscle actin ( $\alpha$ -SMA)    | ACTGGTATTGTGCTGGACTCTG | TAGTCACGAAGGAATAGCCACG |
| Smooth muscle (SM22 $\alpha$ )          | CCCAGACACCGAAGCTACTC   | GACTGCACTTCTCGGCTCAT   |
| h-caldesmon                             | TACACCAATGCAATCGAGGGAA | TACATCTCCTGGCCTCAAGTCA |

---
